# Supplementary material for: Effect of the protein hydrolysate of rice syrup meal on the endurance exercise performance of BALB/c mice
Source: Royal Society of Chemistry journal article supplement (doi:10.1039/d0fo02667k), 2020-12-16
Supplement: d0fo02667k1.pdf [file d0fo02667k1.pdf]

Table S1: Effect of protein hydrolysate of rice syrup meal on body weight in forced swimming mice

| Body weight (g) | Week                     |                          |                          |                          |                          |
|-----------------|--------------------------|--------------------------|--------------------------|--------------------------|--------------------------|
|                 | 1 <sup>st</sup>          | 2 <sup>nd</sup>          | 3 <sup>rd</sup>          | 4 <sup>th</sup>          | 5 <sup>th</sup>          |
| CON             | 22.38±0.14 <sup>ns</sup> | 22.68±0.34 <sup>ns</sup> | 22.52±0.19 <sup>ns</sup> | 22.96±0.20 <sup>ns</sup> | 23.66±0.25 <sup>ns</sup> |
| RL              | 22.18±0.44               | 23.00±0.50               | 23.22±0.39               | 23.36±0.56               | 23.68±0.66               |
| RH              | 22.08±0.19               | 22.62±0.10               | 22.94±0.05               | 23.08±0.52               | 23.96±0.16               |
| PL              | 21.74±0.28               | 22.62±0.29               | 22.80±0.29               | 23.32±0.40               | 23.54±0.40               |
| PH              | 23.08±0.19               | 23.24±0.24               | 23.52±0.23               | 23.84±0.32               | 24.32±0.45               |

CON: control group, RL: 1.5 g kg<sup>-1</sup> of rice syrup meal, RH: 3 g kg<sup>-1</sup> of rice syrup meal, PL: 1.5 g kg<sup>-1</sup> of protein hydrolysate of rice syrup meal, PH: 3 g kg<sup>-1</sup> of protein hydrolysate of rice syrup meal. Data are represented as the means ± standard error of the mean (SEM) for each group (n = 8). Different letters indicate significant differences ( $p < 0.05$ ) among samples by one-way ANOVA followed by post-hoc Tukey's test.

Table S2: Effect of protein hydrolysate of rice syrup meal on blood lactate and glucose level after 70% maximum forced swimming

| <b>Groups</b> | <b>Lactate (mmol L<sup>-1</sup>)</b> | <b>Glucose (mmol L<sup>-1</sup>)</b> |
|---------------|--------------------------------------|--------------------------------------|
| CON           | 6.93±0.60                            | 66.75±8.66 <sup>ns</sup>             |
| RL            | 3.60±0.27 <sup>***</sup>             | 74.75±4.57                           |
| RH            | 3.43±0.32 <sup>***</sup>             | 78.00±1.75                           |
| PL            | 3.45±0.18 <sup>***</sup>             | 67.50±2.35                           |
| PH            | 3.03±0.32 <sup>***</sup>             | 84.75±2.43                           |

CON: control group, RL: 1.5 g kg<sup>-1</sup> of rice syrup meal, RH: 3 g kg<sup>-1</sup> of rice syrup meal, PL: 1.5 g kg<sup>-1</sup> of protein hydrolysate of rice syrup meal, PH: 3 g kg<sup>-1</sup> of protein hydrolysate of rice syrup meal. Data are represented as the means ± standard error of the mean (SEM) for each group (n = 8). <sup>\*\*\*</sup>*p* < 0.001 vs. CON group (ANOVA followed by post-hoc Tukey's test).

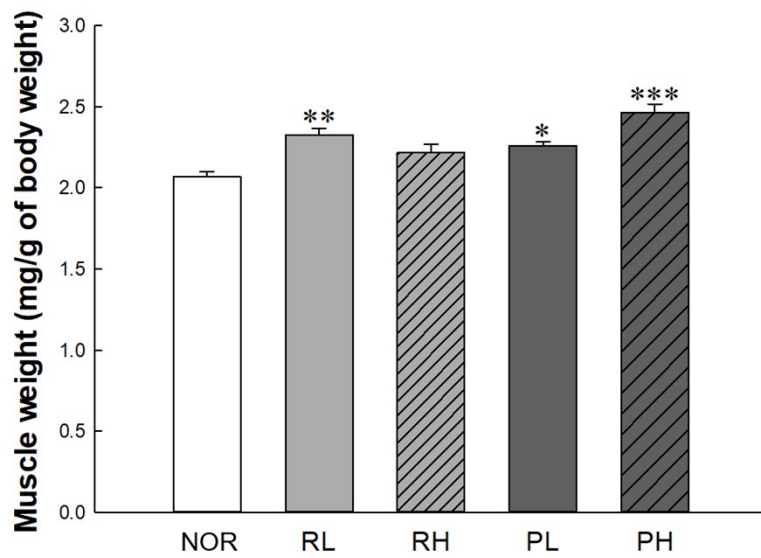

Figure S1: Effect of protein hydrolysate of rice syrup meal on muscle weight in forced swimming mice. CON: control group, RL: 1.5 g kg<sup>-1</sup> of rice syrup meal, RH: 3 g kg<sup>-1</sup> of rice syrup meal, PL: 1.5 g kg<sup>-1</sup> of protein hydrolysate of rice syrup meal, PH: 3 g kg<sup>-1</sup> of protein hydrolysate of rice syrup meal. Data are represented as the means  $\pm$  standard error of the mean (SEM) for each group (n = 8). \* $p$  < 0.05, \*\* $p$  < 0.01, and \*\*\* $p$  < 0.001 vs. CON group (ANOVA followed by post-hoc Tukey's test).
